# Supplementary material for: P300 inhibition enhances gemcitabine-induced apoptosis of pancreatic cancer
Source: PubMed Central journal article supplement (PMC5239476; doi:10.18632/oncotarget.10117), 2016-06-17
Supplement: oncotarget-07-51301-s001.pdf [file oncotarget-07-51301-s001.pdf]

## P300 inhibition enhances gemcitabine-induced apoptosis of pancreatic cancer

### Supplementary Materials

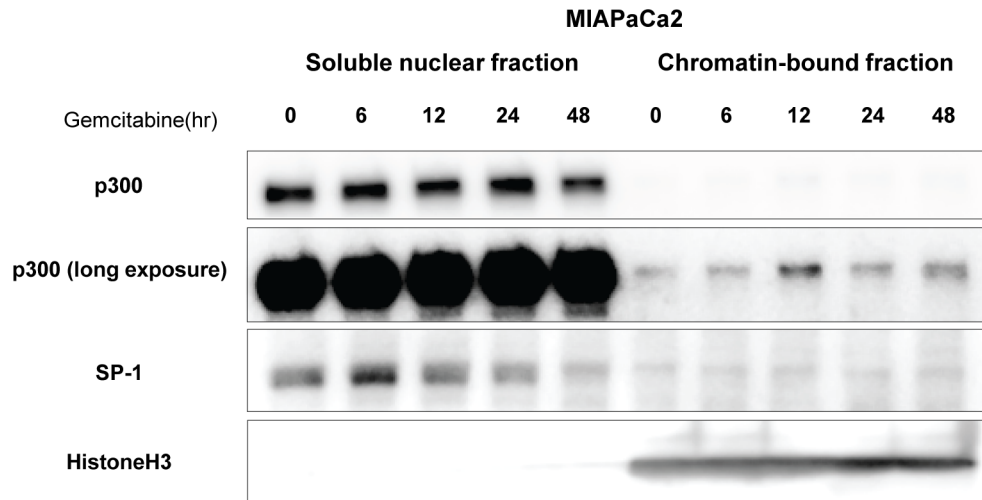

**Supplementary Figure S1: p300 expression in soluble fraction and chromatin-bound fraction of MIAPaCa2 cells during gemcitabine treatment.** Cells were treated with 25 nM gemcitabine. p300 expression in soluble fraction did not change within 48 hours, while p300 was recruited to chromatin, response to gemcitabine treatment.

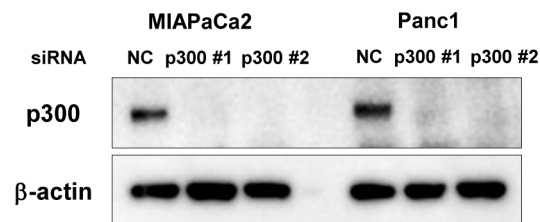

**Supplementary Figure S2: The effects of p300-specific siRNA on p300 protein expression.** p300 expression was suppressed by p300-specific siRNAs in both MIAPaCa2 and Panc1 cells at 48 hours. The efficacy of siRNAs from different vendors were the same.
